1 ***Phytophthora* methylomes modulated by expanded**  
2 **6mA methyltransferases are associated with adaptive**  
3 **genome regions**

4

5 **Han Chen<sup>1</sup>, Haidong Shu<sup>1</sup>, Liyuan Wang<sup>1</sup>, Fan Zhang<sup>1</sup>, Xi Li<sup>1</sup>, Sylvans Ochieng**  
6 **Ochola<sup>1</sup>, Fei Mao<sup>2</sup>, Hongyu Ma<sup>1</sup>, Wenwu Ye<sup>1</sup>, Tingting Gu<sup>3</sup>, Lubing Jiang<sup>4</sup>, Yufeng**  
7 **Wu<sup>2</sup>, Yuanchao Wang<sup>1</sup>, Sophien Kamoun<sup>5</sup>, Suomeng Dong<sup>1</sup> \***

8

9 1. College of Plant Protection, Nanjing Agricultural University, Nanjing, Nanjing 210095,  
10 China.

11 2. National Key Laboratory for Crop Genetics and Germplasm Enhancement, Nanjing  
12 Agricultural University, Nanjing 210095, China.

13 3. College of Horticulture, Nanjing Agricultural University, Nanjing 210095, China.

14 4. Institute Pasteur of Shanghai, Chinese Academy of Sciences, Shanghai 200031, China.

15 5. The Sainsbury Laboratory, Norwich Research Park, Norwich NR4 7UH, United Kingdom.

16

17 \* Corresponding author: Suomeng Dong ([smdong@njau.edu.cn](mailto:smdong@njau.edu.cn))

18

19 **Abstract**

20 Filamentous plant pathogen genomes often display a bipartite architecture with gene  
21 sparse, repeat-rich compartments serving as a cradle for adaptive evolution. However,  
22 the extent to which this “two-speed” genome architecture is associated with genome-wide  
23 epigenetic modifications is unknown. Here, we show that the oomycete plant pathogens  
24 *Phytophthora infestans* and *Phytophthora sojae* possess functional adenine N6-  
25 methylation (6mA) methyltransferases that modulate patterns of 6mA marks across the  
26 genome. In contrast, 5-methylcytosine (5mC) could not be detected in the two  
27 *Phytophthora* species. Methylated DNA IP Sequencing (MeDIP-seq) of each species  
28 revealed that 6mA is depleted around the transcriptional starting sites (TSS) and is  
29 associated with low expressed genes, particularly transposable elements. Remarkably,  
30 genes occupying the gene-sparse regions have higher levels of 6mA compared to the  
31 remainder of both genomes, possibly implicating the methylome in adaptive evolution of  
32 *Phytophthora*. Among three putative adenine methyltransferases, DAMT1 and DAMT3  
33 displayed robust enzymatic activities. Surprisingly, single knockouts of each of the 6mA  
34 methyltransferases in *P. sojae* significantly reduced *in vivo* 6mA levels, indicating that the  
35 three enzymes are not fully redundant. MeDIP-seq of the *damt3* mutant revealed uneven  
36 patterns of 6mA methylation across genes, suggesting that PsDAMT3 may have a  
37 preference for gene body methylation after the TSS. Our findings provide evidence that  
38 6mA modification is an epigenetic mark of *Phytophthora* genomes and that complex  
39 patterns of 6mA methylation by the expanded 6mA methyltransferases may be  
40 associated with adaptive evolution in these important plant pathogens.

41

## 42 Introduction

43 DNA methylation, one of the fundamental epigenetic marks, participates in many biological  
44 processes in both eukaryotes and prokaryotes<sup>1-3</sup>. The most studied form of DNA  
45 methylation is 5-methylcytosine (5mC), which is a prevalent DNA modification in mammals  
46 and plants<sup>4</sup>. The 5mC modification plays a role in many processes, such as transposon  
47 silencing, regulation of gene expression and epigenetic memory maintenance<sup>5</sup>. The  
48 amount of 5mC present in DNA varies across organisms and is barely detectable or absent  
49 in many species, such as the nematode (*Caenorhabditis elegans*), the fruit fly (*Drosophila*  
50 *melanogaster*) and brewers yeast (*Saccharomyces cerevisiae*)<sup>6</sup>. Comparatively, the N6-  
51 methyladenine (6mA) modification is extensively distributed in prokaryotic genomes. A  
52 prominent function of 6mA is in discriminating between host DNA and invading DNA, thus  
53 contributing to prokaryote immunity against phages and other invading genetic elements<sup>7</sup>.  
54 Besides, 6mA is also involved in DNA replication, repair, virulence, and gene regulation<sup>8-</sup>  
55 <sup>11</sup>.

56 In contrast to prokaryotes, the occurrence and biological functions of 6mA methylation  
57 in eukaryotic organisms remain largely uncharacterized. There is increasing evidence that  
58 6mA is present in eukaryotes, including mammals, nematodes, algae, fruit flies, frogs, and  
59 fungi<sup>12-16</sup>. Genome-wide 6mA distribution patterns can be identified by several robust  
60 methods such as methylated DNA immunoprecipitation sequencing (MeDIP-seq)<sup>14,15</sup>,  
61 6mA-sensitive restriction enzyme digestion coupled with high-throughput sequencing<sup>17</sup>,  
62 and single molecule real time sequencing (SMRT sequencing)<sup>12,13</sup>. The 6mA pattern  
63 appears to be dynamic during development; for instance, the early embryonic stage of  
64 *Drosophila* has relatively higher 6mA levels compared to later stages<sup>14,18</sup>. Furthermore, the  
65 genomic localization of 6mA significantly differs among organisms<sup>13-15</sup>. The 6mA  
66 modification is widely and evenly distributed in the *Caenorhabditis elegans* genome. By  
67 contrast, 6mA is enriched around transcription start sites (TSS) in early-diverging fungi and  
68 *Chlamydomonas*, and is enriched in transposable elements in *Drosophila*. The localization  
69 patterns associate with 6mA biological functions. For example, in *Chlamydomonas* and  
70 fungi, 6mA is enriched around the TSSs of actively expressed genes, suggesting that 6mA  
71 may be an active mark for gene expression<sup>12, 15</sup>, while 6mA appears to suppress  
72 transcription on the X chromosome in mouse embryonic stem cell<sup>16</sup>

73 Like many other epigenetic marks, 6mA can be reversibly modulated by enzymes such  
74 as methyltransferase and demethylase<sup>13,14</sup>. It is known that DAM and M.MunI are classical  
75 bacterial 6mA methyltransferases<sup>19</sup>. In eukaryotic cells, enzymes from the MT-A70 protein  
76 family that evolved from M.MunI<sup>20</sup>, are considered 6mA methyltransferases.  
77 Overexpression of the MT-A70 homolog DAMT-1 from *C. elegans* in insect cells elevated  
78 the 6mA level, whereas knockdown of *damt-1* resulted in a decrease in the amount of 6mA,  
79 suggesting that DAMT-1 is a potential 6mA methyltransferase in nematodes<sup>13</sup>. However,  
80 methyltransferase-like protein 3 (METTL3) and METTL14 of the MT-A70 family catalyse  
81 6mA on mammalian mRNA but weakly on DNA<sup>21</sup>. The Alkylation repair homologs (AlkB)  
82 protein family is involved in DNA damage repair, and could catalyse demethylation of both  
83 methylated DNA and RNA<sup>13,16,22,23</sup>. MT-A70 and AlkB homologs are prevalent in many  
84 organisms and most of them are not functionally characterized. However, it is possible

85 that other RNA and DNA demethylase and methyltransferase proteins could have evolved  
86 to regulate 6mA DNA in eukaryotic species.

87 The Oomycetes are a group of eukaryotic organisms that include a variety of  
88 pathogens that infect plants and animals<sup>24</sup>. A notorious example is *Phytophthora*  
89 *infestans*, the causal agent of potato late blight disease which sparked the Irish famine,  
90 resulting in starvation and migration of millions of people in the 1840s<sup>25</sup>. An additional  
91 example is *Phytophthora sojae*, a soybean root pathogen that currently threatens global  
92 soybean production. These two species are model organisms among oomycetes<sup>26</sup>. The  
93 genomes of these *Phytophthora* display a bipartite architecture, with gene-sparse and  
94 repeat-rich regions (GSR) and gene-dense regions (GDR)<sup>25</sup>. The GSR compartments  
95 are associated with accelerated gene evolution, serving as a cradle for adaptive  
96 evolution<sup>27-29</sup>. However, the biological roles of DNA modifications and their associations  
97 with adaptive genome evolution remain unknown. In this study, we demonstrate that  
98 6mA, rather than 5mC, is the major DNA methylation in these two *Phytophthora* species.  
99 We show that *P. infestans* and *P. sojae* genomes encode expanded numbers of 6mA  
100 methyltransferases (DAMT). Two of the three DAMTs have methyltransferase activity,  
101 and the 6mA methylation landscapes are described at the genome-wide level using  
102 methylated DNA immuno precipitation sequencing (MeDIP-seq). Although the majority of  
103 the methylation sites localized in the intergenic regions, 6mA also prefers to accumulate  
104 around TSS regions in a bimodal distribution pattern and may function as a repressive  
105 mark of gene expression. The GSR genes show higher a methylation level than the GDR  
106 genes. Consistently, most 6mA sites accumulate in repetitive sequences, such as DNA  
107 elements and long terminal repeat (LTR) elements. Furthermore, individual knockouts of  
108 each of the three *DAMT* genes results in a reduction of 6mA level *in vivo*. Moreover,  
109 comparative analysis of the MeDIP-seq data of the mutants suggests that the *DAMTs*  
110 may have functional specificity in targeting particular genomic regions.

111

## 112 Results

113 To determine whether *Phytophthora* species can accomplish the 5mC modification, we  
114 performed a hidden Markov models based sequence similarity search for 5mC  
115 methyltransferase homologs in the *P. infestans* and *P. sojae* genomes<sup>30,31</sup>. No predicted  
116 gene or homologous sequence corresponding to a 5mC methyltransferase was discovered  
117 (**Supplementary Table 1**). To test directly for the presence of 5mC, we analyzed  
118 hydrolyzed genomic DNA (gDNA) samples from *P. infestans* and *P. sojae* by high-  
119 performance liquid chromatography (HPLC) and Ultra Performance Liquid  
120 Chromatography Electrospray Ionization - Mass Spectrum (UPLC-ESI-MS/MS). We did  
121 not detect 5mC in either species at the parts per billion (PPB) level ( $10^{-9}$ g/mL)  
122 (**Supplementary Fig. 1a, b**). Furthermore, the endonuclease McrBC that specifically  
123 cleaves DNA containing 5mC did not digest *Phytophthora* gDNA, similarly to gDNA of  
124 *Drosophila melanogaster*, which is known to not carry 5mC (**Supplementary Fig. 1c**).  
125 Therefore, none of the methods we employed could detect 5mC in either *P. infestans* or *P.*  
126 *sojae* DNA.

127 Although we did not identify genes encoding for 5mC methyltransferases in *P.*  
128 *infestans* and *P. sojae*, we did identify homologs of 6mA methyltransferases and  
129 demethylases in the *Phytophthora* genomes. Initially, we discovered a potential MT-A70  
130 homolog in the *P. sojae* but not *P. infestans* genome. However, closer examination of the  
131 putative *P. sojae* MT-A70 gene indicated that it is a pseudogene with a premature stop  
132 codon. We found that N6-adenineMlase domain-containing (*DAMT*) proteins are present  
133 in all the examined oomycete species, including *Phytophthora* species, *Albugo* species,  
134 *Hyaloperonospora arabidopsidis*, *Pythium ultimum* and *Saprolegnia parasitica* (**Fig. 1a**).  
135 The *Phytophthora* and *Saprolegnia* genomes each encode three predicted *DAMT* genes,  
136 whereas the other species have only one gene. Phylogenetic analyses of the oomycete  
137 *DAMT*s uncovered two distinct gene clades, namely *DAMT1/2* and *DAMT3*  
138 (**Supplementary Fig. 2a**). In contrast to *DAMT1* and *DAMT2*, *DAMT3* is conserved in all  
139 the examined oomycete genomes except *H. arabidopsidis* (**Supplementary Fig. 2a**,  
140 **Supplementary Table 2**). *DAMT3* is located in a genomic region with a high degree of  
141 synteny (**Supplementary Fig. 2b**), suggesting that it is probably the ancestral gene. *DAMT*  
142 gene expansion in *Phytophthora* species therefore appears to be due to the emergence of  
143 the *DAMT1/2* genes. A closer examination of the catalytic motif responsible for binding the  
144 methyl group from S-adenosyl-L-methionine<sup>13,20,32</sup> indicates that *DAMT1* and *DAMT3*  
145 proteins have functional motifs consisting of the amino acid sequences DPPY and DPPF,  
146 respectively. However, this motif was naturally mutated into EPPH in the *DAMT2* proteins.  
147 A search in the *P. infestans* and *P. sojae* online RNA-seq databases revealed that *DAMT*s  
148 are expressed in all the examined growth stages<sup>33,34</sup> (**Supplementary Fig. 2d, e**). In  
149 summary, bioinformatics analyses indicate that *Phytophthora* species may possess the  
150 enzymatic machinery for 6mA DNA methylation.

151 To verify the enzymatic activity of these putative methyltransferases, we measured the  
152 *in vitro* methyltransferase activity of three *P. sojae* recombinant *DAMT* proteins. The  
153 recombinant proteins, together with 6mA-free lambda DNA and substrate S-adenosyl-L-  
154 methionine, were incubated together in an *in vitro* enzymatic assay<sup>35</sup>. These

## Figure 1

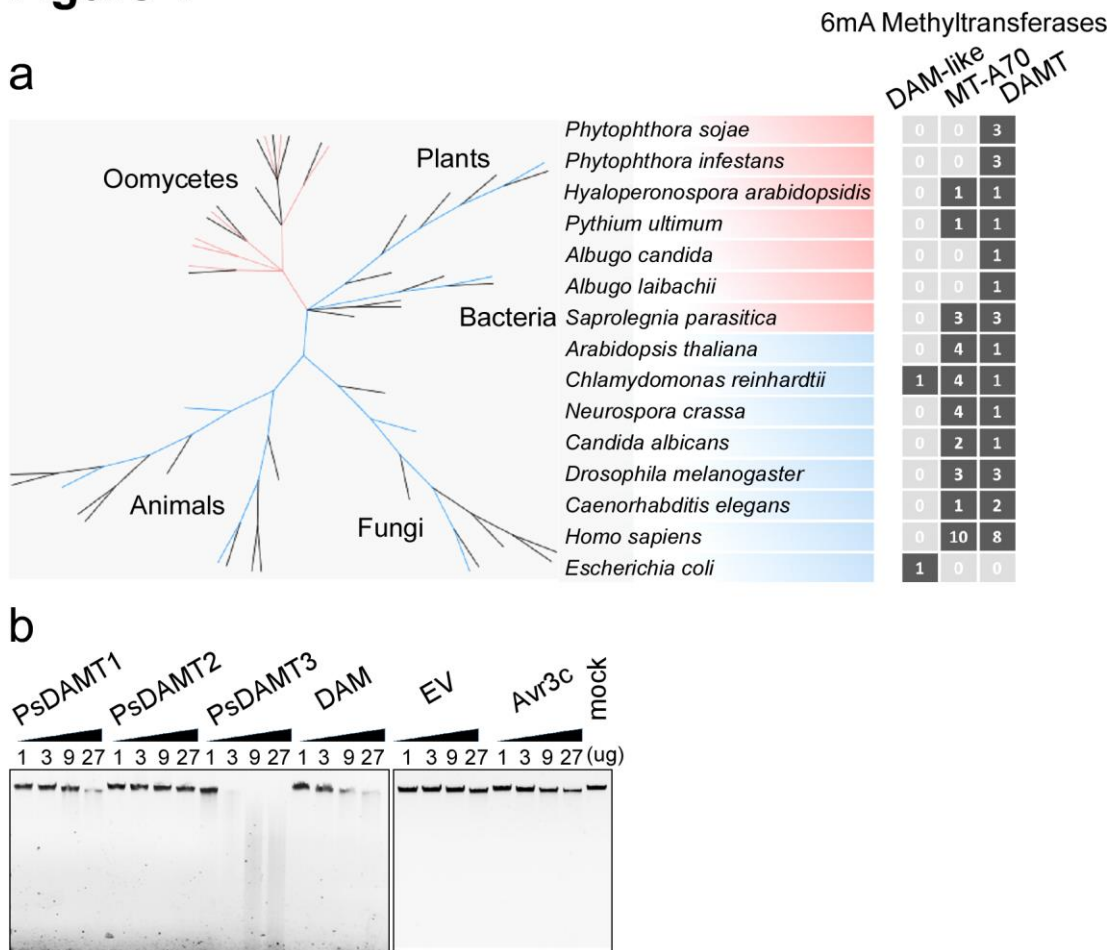

155

156 **Figure. 1 *Phytophthora* genomes encode functional 6mA Methyltransferases.**  
 157 **(a)** N6-adenineMlase domain-containing (*DAMT*) gene expansion in *Phytophthora*  
 158 species. Two families of methyltransferase genes (*DAM-like*, *MT-A70*) and the *DAMT*  
 159 family genes from seven oomycete organisms and eight model organisms are shown in a  
 160 simplified phylogenetic tree. Color codes: oomycetes (red), other model organisms  
 161 (blue), presence of gene homolog (black) and absence of gene homolog (grey). The  
 162 number of homologous genes in each organism is also labelled.  
 163 **(b)** *In vitro* DpnI-dependent DNA methylation assay suggests that *Phytophthora* DAMTs  
 164 have methyltransferase activity. Recombinant proteins PsDAMT1, PsDAMT2, PsDAMT3  
 165 together with bacteria 6mA DNA methylase (*DAM*) were produced in *E. coli*. EV (empty  
 166 vector) and Avr3c (a *Phytophthora* secretion protein) were used as controls. The  
 167 recombinant protein gradient ranged from 1  $\mu$ g to 27  $\mu$ g in each reaction. The  
 168 experiments were carried out by triplicates with similar results.

169 assays revealed that lambda DNA is smeared by treatment with the restriction enzyme  
 170 DpnI, which recognizes the 6mA methylated GATC site, in the presence of recombinant  
 171 PsDAMT1, PsDAMT3, or the bacterial 6mA methyltransferase *DAM* (**Fig. 1b**). Notably,  
 172 PsDAMT3 was the most active methyltransferase *in vitro*. We did not detect any activity for  
 173 PsDAMT2 in this assay, even after increasing PsDAMT2 concentration (**Fig. 1b**). We also  
 174 performed a complementary methylation assay in the 6mA deficient *E. coli* strain HST04.

175 In this assay, *E. coli* gDNA from DH5 $\alpha$  and *DAM* complemented HST04 transformants were  
176 digested by DpnI as expected. The *E. coli* gDNA from *PsDAMT1* and *PsDAMT3*  
177 transformants could also be digested by DpnI, whereas those from *PsDAMT2* and the  
178 transformants of the catalytically dead mutants (*PsDAMT1*<sup>APPA</sup>, *PsDAMT3*<sup>APPA</sup>) could not  
179 be digested (**Supplementary Fig. 3a**). Overall, these data indicate that the *P. sojae*  
180 *DAMT1* and *DAMT3* proteins possess methyltransferase activity in a DPPY(F) motif-  
181 dependent manner.

182 To test for the presence of 6mA in *Phytophthora*, we used UPLC-ESI-MS/MS to  
183 analyze gDNA samples from *P. sojae* and *P. infestans*. A peak matching the retention time  
184 of standard 6mA was present in the test samples from these two *Phytophthora* species  
185 (**Fig. 2a**). Moreover, the same base fragment was detected in the two samples by MS/MS  
186 of the 266.12 (mass/charge ratio), which also matched the standard 6mA (**Fig. 2b**). Thus,  
187 the 6mA DNA base modification is present in the gDNA samples. Furthermore, we  
188 estimated the abundance of 6mA in *P. sojae* and *P. infestans* to be 400 and 500 parts per  
189 million (PPM), respectively, as determined by UPLC-ESI-MS/MS (**Fig. 2c, Supplementary**  
190 **Table 2**). The 6mA level in these *Phytophthora* species is approximately 60-fold higher  
191 than in *Homo sapiens* and *Mus musculus*, but is lower than a few early-diverging fungal  
192 species like *Hesseltinella vesiculosa* and *Piromyces finnis*<sup>12,36</sup>. To further test for the  
193 presence of 6mA in *Phytophthora* gDNA, we used commercially available antibodies that  
194 specifically recognize the 6mA modification; immune blot signals were robustly detected in  
195 gDNA samples of *P. infestans* and *P. sojae*. (**Fig. 2d**). Collectively, our results show that  
196 6mA is a naturally occurring DNA modification in *Phytophthora* genomes.

197 We performed methylated DNA immuno precipitation-sequencing (MeDIP-seq) to  
198 obtain a genome-wide insight into the *Phytophthora* 6mA methylome. The MeDIP-seq  
199 experiments on gDNA samples from mycelium growth stages included two biological  
200 replicates for each of the two *Phytophthora* species. After assembling sequencing data and  
201 seeking 6mA-enriched regions, we mapped 6mA peaks (6mA-enriched regions) at a  
202 genome-wide level with FDR < 0.01 by SICER<sup>37</sup>. A total of 12,611 overlapping methylation  
203 peaks were captured from the two *P. infestans* biological replicates. A total of 3,031  
204 overlapping peaks were called from two *P. sojae* replicates (**Supplementary Fig. 4a**).  
205 Genome-wide 6mA methylation profiling data revealed that 86% and 55% of the 6mA  
206 peaks were located in the intergenic regions in *P. infestans* and *P. sojae*, respectively  
207 (**Supplementary Fig. 4b**). The higher proportion of 6mA intergenic localization in *P.*  
208 *infestans* results from the larger overall fraction of intergenic gDNA in the expanded 240  
209 Mbp genome of this species compared to *P. sojae*. In *P. sojae*, 25% of the 6mA peaks mark  
210 gene bodies, whereas 15% and 5% of the methylations occupy positions upstream and  
211 downstream of gene bodies, respectively. Comparatively, in *P. infestans*, these figures  
212 correspond to 8%, 4%, and 2% (**Supplementary Fig. 4b**). Overall, our analyses revealed  
213 1,805 and 1,343 genes with 6mA marks in *P. infestans* and *P. sojae*, respectively.

214 Profiling of 6mA distribution in methylated genes revealed that 6mA peaks tend to flank  
215 the transcriptional start site (TSS) with a clear depletion near the TSS itself (**Fig. 3a-c**),  
216 resembling the bimodal distribution pattern of 6mA detected in other organisms,

## Figure 2

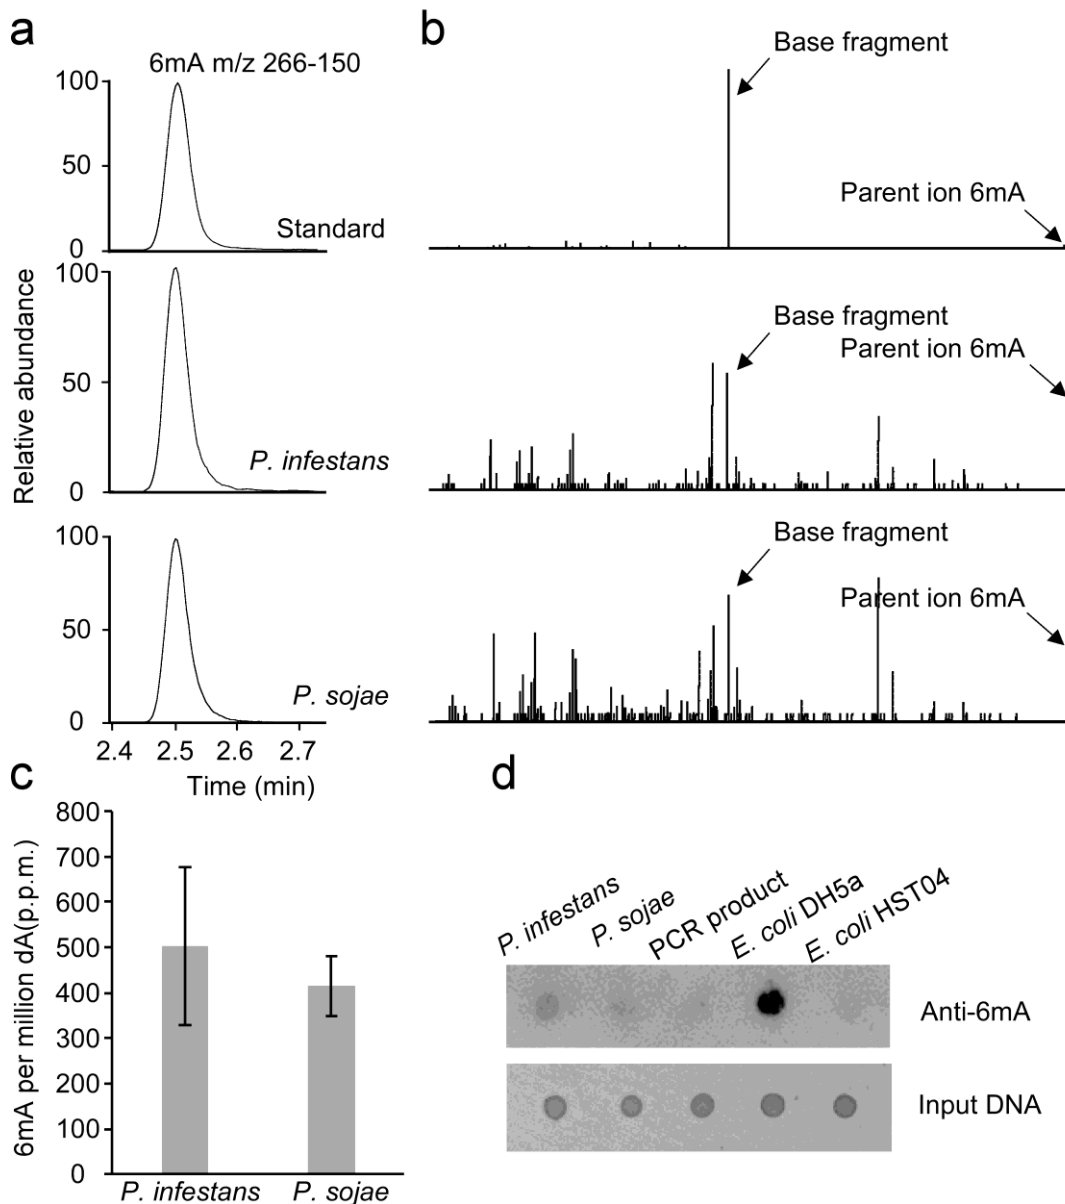

217

218 **Figure. 2 6mA occurs in *Phytophthora* genomic DNA.**

219 **(a)** *Phytophthora* mycelium 6mA were detected by UPLC. The selective multiple reaction  
 220 monitoring (MRM) transitions for 6mA were setting as m/z 266-150. The retention time of  
 221 standard 6mA was present in *Phytophthora* gDNA samples.

222 **(b)** *Phytophthora* 6mA are detected by UPLC-ESI-MS/MS. The parent ion 6mA (m/z near  
 223 266.12) and base fragment (m/z near 150.07) highlighted by arrows from samples also  
 224 matches standard 6mA.

225 **(c)** Quantification of 6mA levels in *Phytophthora* samples. The 6mA concentrations are  
 226 listed as 6mA per million dA.

227 **(d)** The presence of 6mA in *Phytophthora* gDNA was verified by dot blot assay using a  
 228 specific 6mA antibody. Input DNA was quantified by ethidium bromide-dyed agarose gels.  
 229 Every dot contained 100 ng DNA. The experiments were independently carried out in  
 230 triplicate.



231 such as *Chlamydomonas*<sup>15</sup>. This bimodal distribution pattern can be verified by heatmap  
232 analyses when we plot relative 6mA levels from all the methylated and non-methylated  
233 genes (**Fig. 3c**). We illustrate normalized 6mA MeDIP-seq reads mapped onto loci from  
234 *P. sojae* *Ps\_155563*, *Ps\_128235* and *P. infestans* *PITG\_02506*, *PITG\_02507*,  
235 *PITG\_15808* as typical examples of 6mA localization patterns (**Supplementary Fig. 5a**,  
236 **b**). To gain further insight into the characteristics of 6mA methylated genes, we  
237 conducted a gene ontology (GO) enrichment analysis of methylated genes in both  
238 species. Results from the GO analysis suggest that methylated genes are associated  
239 with functional categories, such as chromatin binding, enzyme regulator, and hydrolase  
240 (**Supplementary Fig. 5c**).

### Figure 3

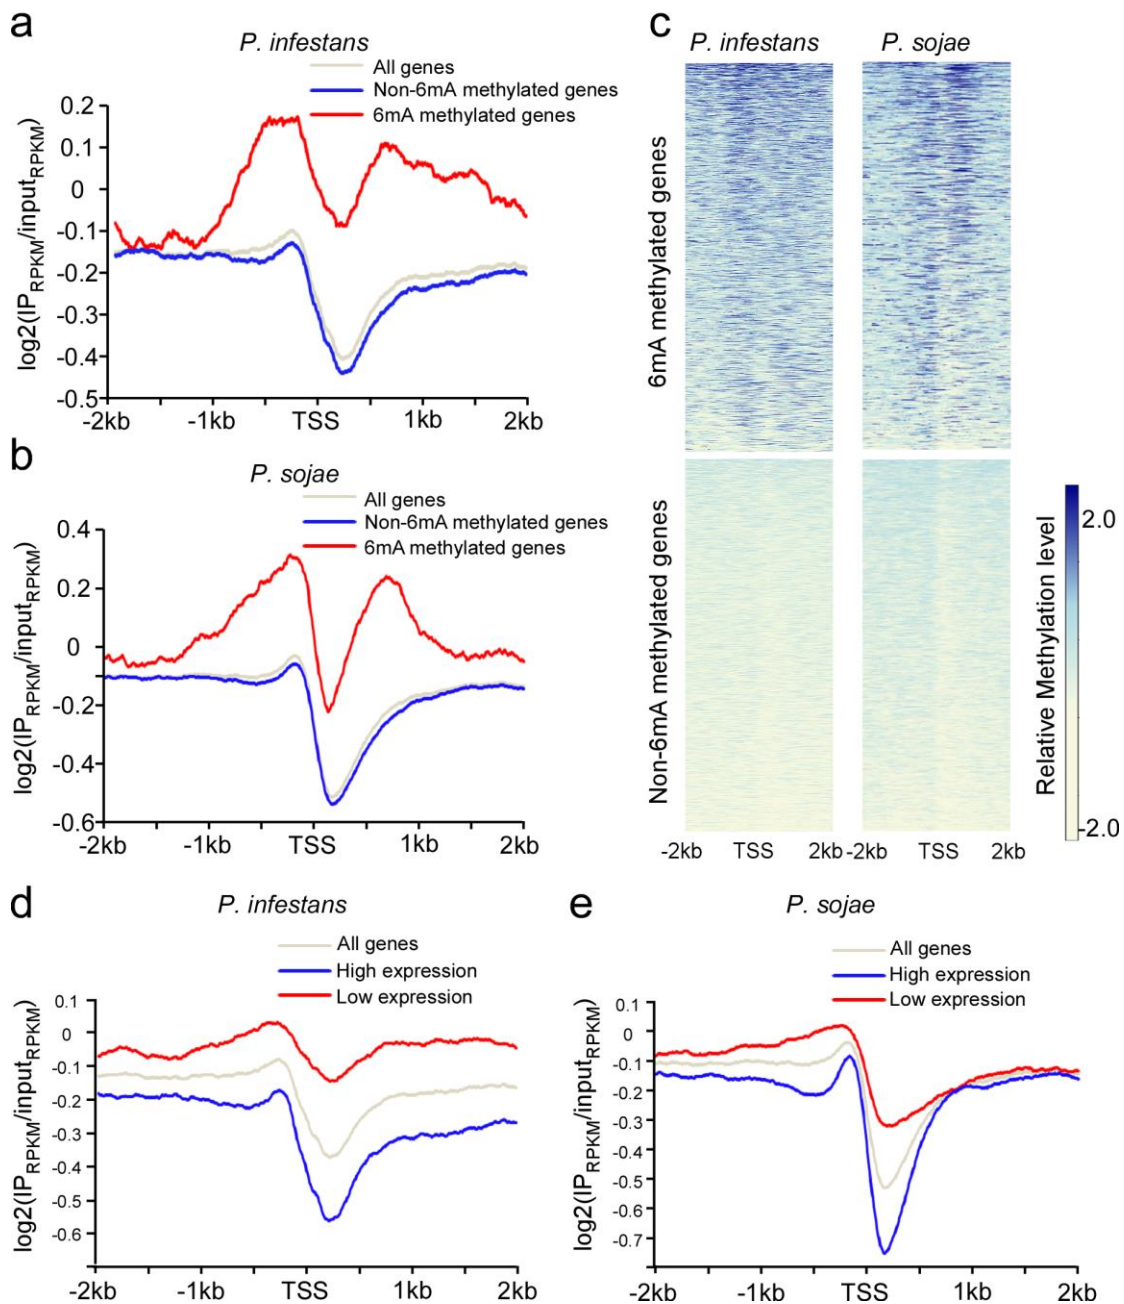

241

242

**Figure. 3 Bimodal distribution pattern of 6mA around TSS in *Phytophthora***

243 The distribution of 6mA peaks around TSS was profiled by MeDIP-seq. The 6mA  
244 occupancy along TSS from -2kb to 2kb is shown. 6mA peaks were enriched around TSS  
245 with a bimodal distribution and a local depletion after TSS in *P. infestans* and *P. sojae*.  
246 **(a)** 6mA occupancy in *P. infestans* methylated genes. All *P. infestans* genes are divided  
247 into 6mA methylated genes (n=1805) and non-6mA methylated genes (n=16374).  
248 **(b)** 6mA occupancy in *P. sojae* methylated genes. All *P. sojae* genes are divided into 6mA  
249 methylated genes (n=1343) and non-6mA methylated genes (n=17853).  
250 **(c)** Heatmap analyses of 6mA signal from individual genes verified the bimodal  
251 distribution pattern in both *Phytophthora* species. The relative methylation signal is  
252 represented using gradient colors.  
253 **(d)** The 6mA level is negatively correlated with gene expression in *P. infestans*. All genes  
254 are divided into two groups: high expression (FPKM>5, n=9927) and low expression  
255 (FPKM<5, n=8252).  
256 **(e)** The 6mA level is negatively correlated with gene expression in *P. sojae*. All genes are  
257 divided into two groups: high expression (FPKM>5, n=9450) and low expression  
258 (FPKM<5, n=9746).

---

259 Although it is debatable how well a GO analysis can inform questions of biological  
260 function, there is increasing evidence that 6mA is an important epigenetic mark for the  
261 regulation of gene expression<sup>12,15</sup>. In particular, the bimodal localization of the 6mA signal  
262 around the TSS prompted us to investigate the relationship between 6mA modification and  
263 gene expression. We compared the 6mA gene methylation data with RNA-seq gene  
264 expression data and examined the average 6mA level of highly expressed genes (FPKM>5)  
265 and lowly expressed genes (FPKM<5) in *P. infestans* and *P. sojae*. Lowly expressed genes  
266 are more likely to be associated with 6mA as this group of genes tends to have more  
267 abundant 6mA levels; in contrast, highly expressed genes tend to have lower 6mA levels  
268 (**Fig. 3d, e**). To further validate these observations, we examined the gene expression  
269 levels of methylated and non-methylated genes in both species. We found that methylated  
270 genes have significantly lower gene expression compared to non-methylated genes in both  
271 species (**Supplementary Fig. 6a, b**). Thus, the data suggests that 6mA negatively  
272 correlates with gene expression levels in the two *Phytophthora* species.

273 It is well established that genomes of *Phytophthora* species have experienced repeat-  
274 driven expansions and are, therefore, rich in repetitive sequences<sup>25-28</sup>. Thus, we examined  
275 the association between 6mA peaks and major types of transposable elements (TEs). A  
276 total of 37% (*P. infestans*) and 15% (*P. sojae*) of the 6mA peaks locate to long terminal  
277 repeat (LTR) elements (class I TEs), whereas 8% (*P. infestans*) and 10% (*P. sojae*) of the  
278 peaks fall within DNA elements (class II TEs), respectively (**Fig. 4a**). Statistical analyses  
279 indicate that 6mA peaks are enriched in TEs at a significant level (**Supplementary Fig.**  
280 **7a**). Moreover, 6mA levels in TEs are higher than the average genomic level in both species  
281 (**Supplementary Fig. 7b**). We conclude that the 6mA methylome is preferentially  
282 associated with TEs in the two *Phytophthora* species.

283 The genomes of *Phytophthora* species have a bipartite “two-speed” architecture with  
284 distinct gene dense regions (GDR) and gene sparse regions (GSR)<sup>25-28</sup>. The dynamic

## Figure 4

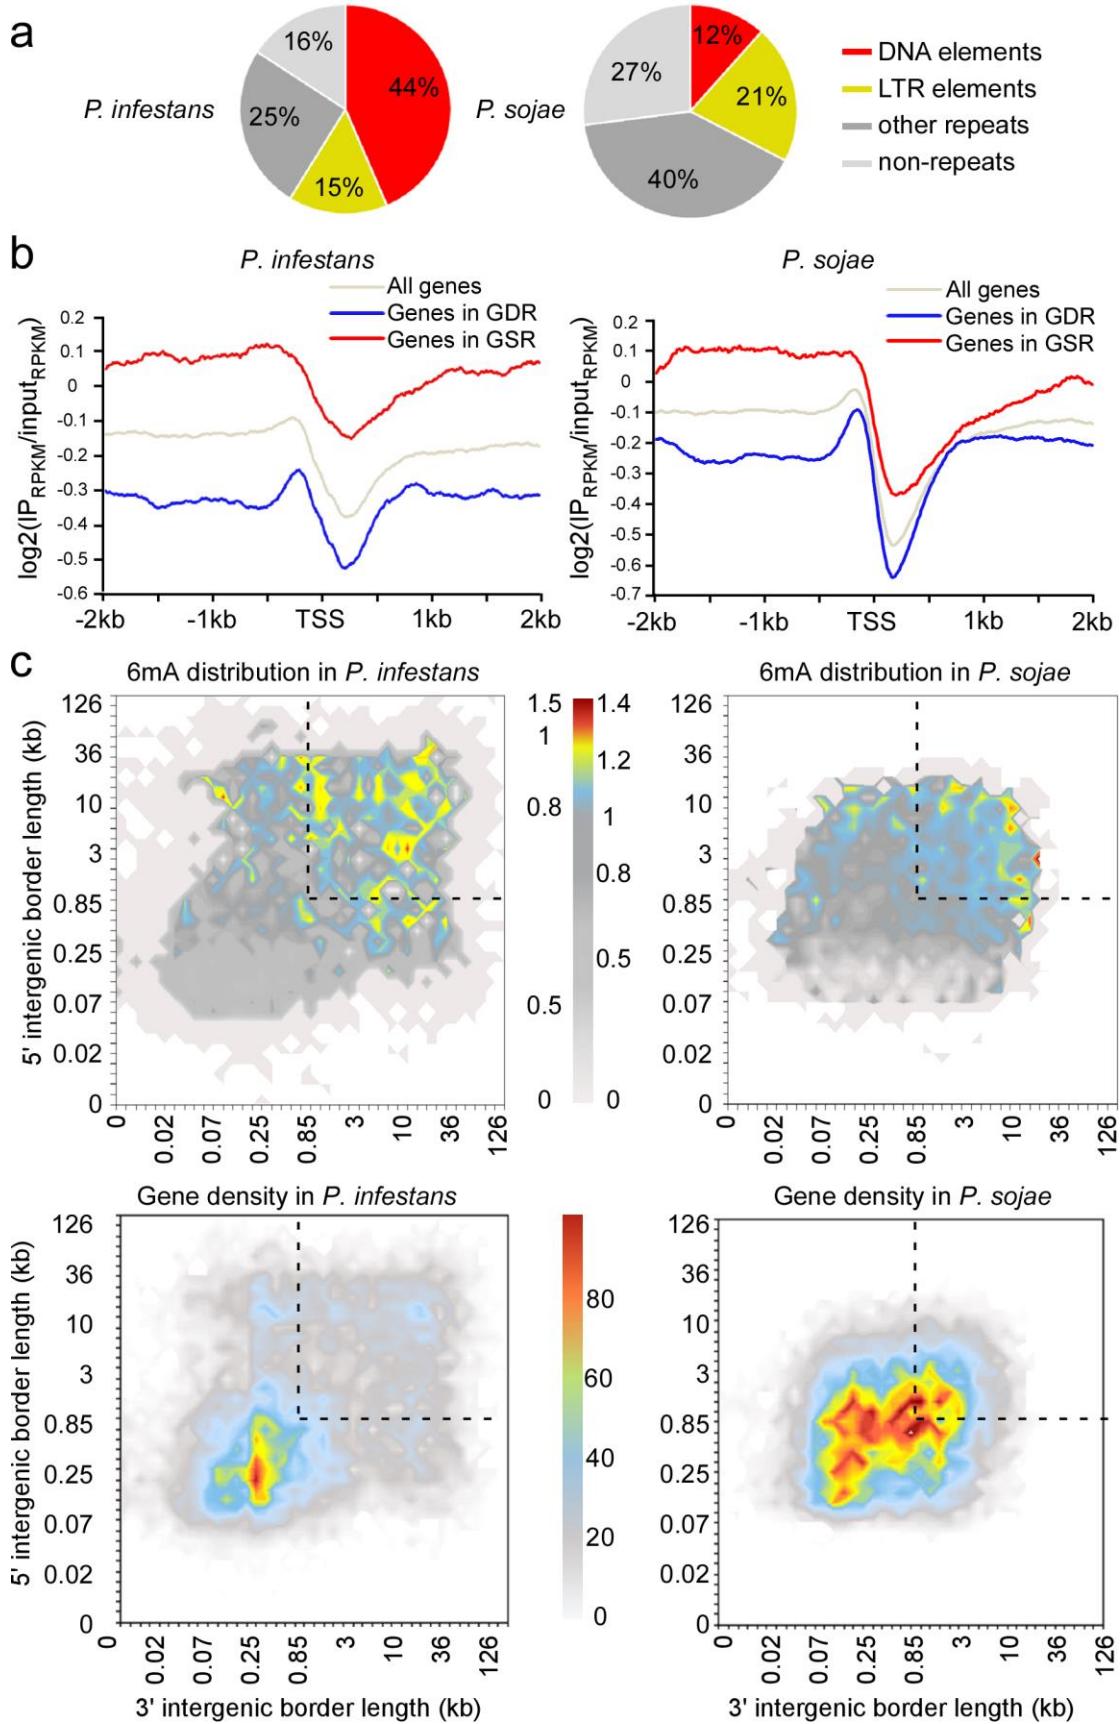

285

286

**Figure. 4 6mA marks *Phytophthora* repetitive elements and highlights gene-**

287 **sparse region.**

288 **(a)** Pie charts illustrate that 6mA peaks are predominantly distributed in repeat  
289 sequences in *P. infestans* and *P. sojae*.

290 **(b)** Genes occupying the gene-sparse regions (GSR) display higher levels of 6mA than  
291 genes occupying the gene-dense region (GDR) in *P. infestans* and *P. sojae*. In *P.*  
292 *infestans*, GSR occupying genes (n=3920) and GDR occupying genes (n=6526) were  
293 calculated. In *P. sojae*, GSR occupying genes (n=3154) and GDR occupying genes  
294 (n=7240) were calculated.

295 **(c)** Heatmap analyses reveal that 6mA accumulate in *P. infestans* and *P. sojae* GSR. All  
296 the genes in each genome were sorted into two dimensional bins on the basis of the  
297 lengths of flanking intergenic distances to neighbouring genes at their 5' and 3' ends. For  
298 the 6mA distribution heatmap, gradient color represents the average normalized 6mA  
299 value of genes in each bin. For the gene density distribution heatmap, gradient color  
300 represents the number of genes in each bin. The dotted line highlights GDR.

---

301 GSR are enriched in rapidly evolving genes, such as virulence effectors, and these regions  
302 are thought to enable a faster rate of pathogen evolution<sup>27-29</sup>. To investigate the relationship  
303 between 6mA and genome architecture, we calculated the average 6mA levels for genes  
304 located in GDR and GSR. These analyses revealed that genes in the GSR tend to have  
305 higher 6mA level than GDR genes (**Fig. 4b, c**). Similarly, we plotted the 6mA methylation  
306 RPKM value of the region corresponding to the 500bp after the TSS according to local  
307 gene density (measured as length of 5' and 3' flanking intergenic regions) to generate the  
308 genome architecture heatmaps previously described<sup>25,27</sup>. The heatmaps revealed a clear  
309 association between the methylome and genome architecture that genes with higher 6mA  
310 levels being enriched in the GSR and reduced in GDR (**Fig. 4d, Supplementary Fig. 8a**).  
311 These observations are consistent with our previous finding that 6mA preferentially  
312 accumulate in repetitive and TE-rich regions, which fill the intergenic regions in the GSR  
313 of *Phytophthora* genomes. Interestingly, further MeDIP-seq analyses demonstrated that  
314 secretome genes, including RxLR effector genes, which are important in *Phytophthora*-  
315 host interactions and are primarily localized in the GSR, have significantly higher 6mA  
316 levels than core orthologous genes (**Supplementary Fig. 8b, c**). We conclude that the  
317 6mA methylome is preferentially associated with both the genes and intergenic regions  
318 that form the gene-sparse compartments of *Phytophthora* genomes.

319 To further investigate the function of DAMTs in *Phytophthora*, we individually  
320 knocked out *DAMT* genes in the *P. sojae* strain P6497 using CRISPR/Cas9 gene editing  
321 methodology. We designed two sgRNAs matching two sites in each of the *DAMT* genes  
322 and harvested at least three independent knockout transformants for each gene  
323 (**Supplementary Table 3, Supplementary Figure 9**). We selected homozygous mutants  
324 *psdamt1-T21* (-139bp), *psdamt2-T52* (-1bp), and *psdamt3-T9* (-374bp) as representative  
325 strains for further analyses. To examine the 6mA level in the *PsDAMTs* mutants, we  
326 applied UPLC-ESI-MS/MS to quantify 6mA abundance. 6mA levels in *psdamt1-T21* and  
327 *psdamt2-T52* were dramatically reduced to only 8.1% and 5.8% of the wild-type strain,  
328 whereas *psdamt3-T9* was reduced to 11.0% (**Fig. 5a, Supplementary Table 4**). Although  
329 our biochemistry assays showed that PsDAMTs have different levels of enzymatic

## Figure 5

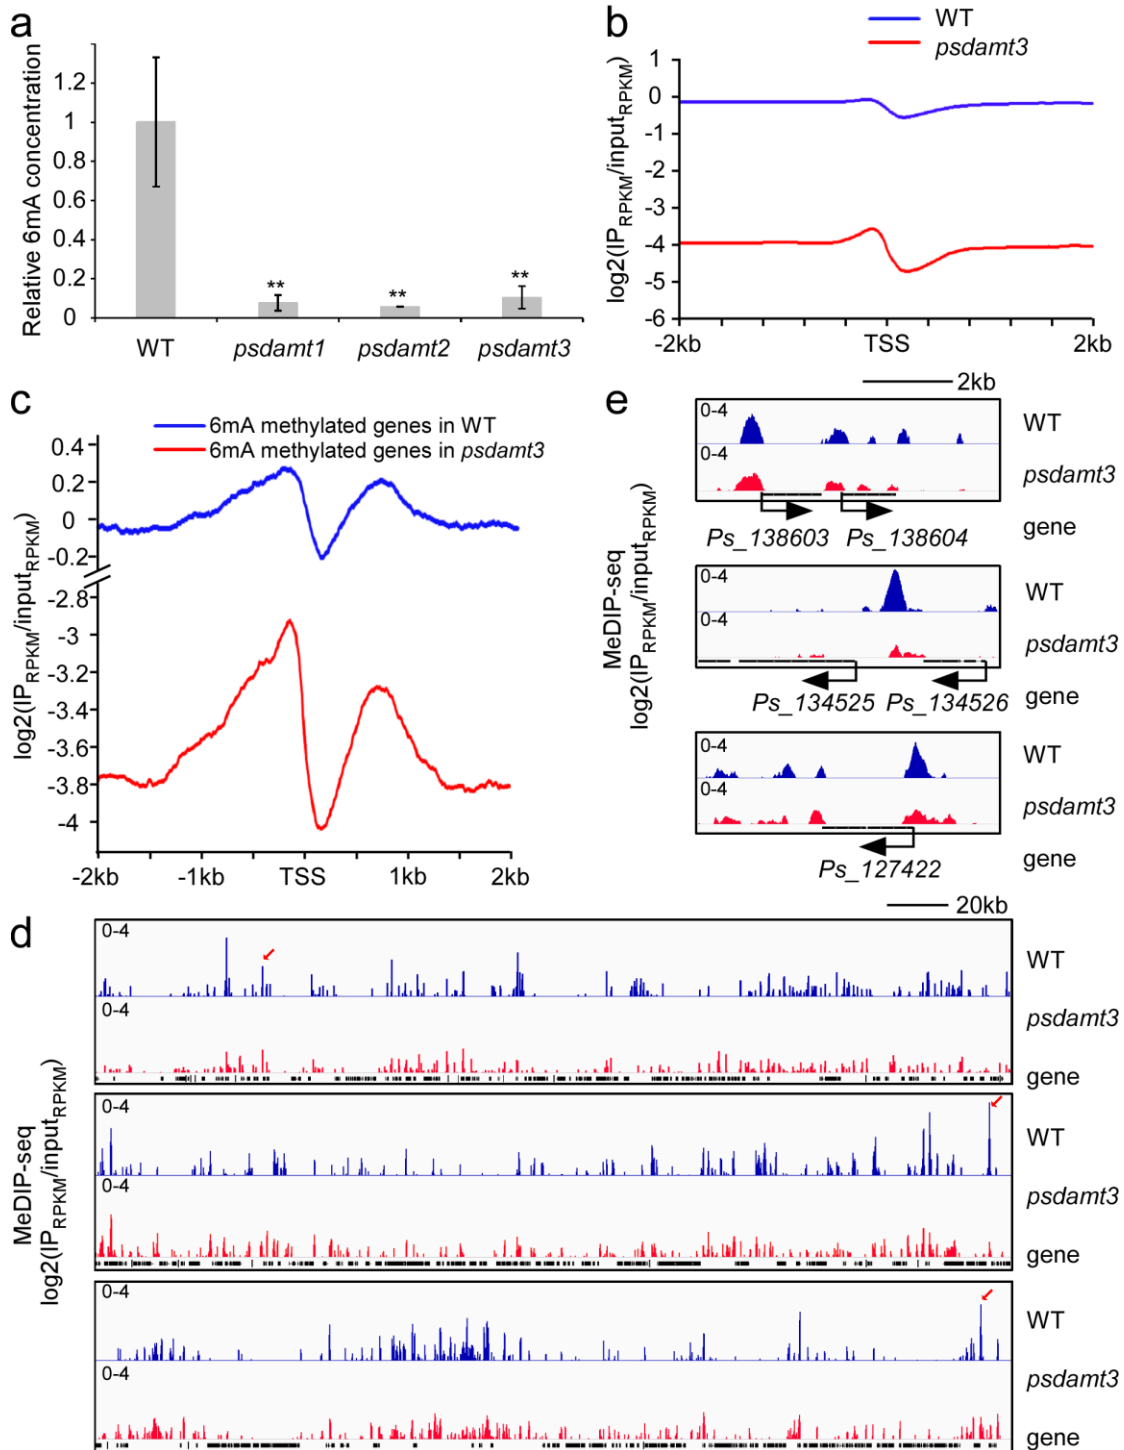

330

331 **Figure. 5 6mA level and landscape are altered in the *Phytophthora* DAMT3 mutant**

332 **(a)** The 6mA levels of DAMT mutants were quantified by UPLC-ESI-MS/MS. WT is *P.*

333 *sojiae* strain P6497. *psdamt1* (T21), *psdamt2* (T52) and *psdamt3* (T9) are representative

334 lines from each of the *DAMT* gene knockout mutants generated by CRISPR/Cas9. \*\*

335 represents significant differences ( $P < 0.01$ , Student's *t* test)

336 **(b)** The average 6mA level of all the genes ( $n = 19196$ ) is reduced in the *P. sojiae psdamt3*

337 mutant.

- 338 **(c)** The average 6mA level of methylated genes (n=1343) is reduced in the *psdamt3*  
339 mutant.  
340 **(d)** Snapshot of 6mA deposition in the *psdamt3* mutant demonstrates that 6mA are widely  
341 but unevenly reduced in a representative genomic segment.  
342 **(e)** Zoom in snapshot of 6mA deposition in *psdamt3* at two gene loci as illustrated in (d).

343 activities, these experiments show that each of the three *PsDAMT* genes significantly  
344 contribute to 6mA modification *in vivo*. Remarkably, the three enzymes do not appear to  
345 be fully redundant as each of the single knock-out mutants had a reduced methylation level.

346 Given that *DAMT3* encodes a functional methyltransferase that is conserved among  
347 all examined oomycete species, we examined the methylome in the *psdamt3* T9 mutant in  
348 more detail using MeDIP-seq. We observed a significant reduction in 6mA levels around  
349 TSS (**Fig. 5b**). 6mA signals were also weaker in *psdamt3* than wild-type at LTR elements  
350 and DNA elements regions (**Supplementary Fig. 10a**). Also, we noted a similar reduction  
351 in 6mA levels for both GSR and GDR genes in the *psdamt3* mutant compared to wild-type  
352 (**Supplementary Fig. 10b**). We conclude that the *PsDAMT3*-regulated 6mA methylome is  
353 not specifically associated with the bipartite genome architecture. However, close  
354 examination of the bimodal methylation pattern around the TSS of 6mA methylated genes  
355 uncovered a greater loss in the second peak in the *psdamt3* mutant compared to the wild-  
356 type (**Fig. 5c**). This unexpected finding indicates that *DAMT* genes may have some degree  
357 of functional specialization, and that *PsDAMT3* may have a preference for the methylation  
358 of gene bodies after the TSS. Representative genomic segments with typical changes in  
359 6mA localization are illustrated for *psdamt3* and wild-type *P. sojae* (**Fig. 5d, e**). The MeDIP-  
360 seq data partially explains the significant reduction of total 6mA levels in the *psdamt3*  
361 mutant, but also illustrates the uneven reduction pattern around the TSS, suggesting that  
362 there are complex patterns of 6mA methylation by the expanded 6mA methyltransferases  
363 of *P. sojae*.

364

## 365 Discussion:

366 It recently became evident that 6mA is not only an important epigenetic mark in  
367 prokaryotes but is also a feature of eukaryotic genomes. Here, we demonstrate that 6mA  
368 methylation occurs in the oomycete plant pathogens *P. infestans* and *P. sojae*, and  
369 document the methylome of these species. Remarkably, the 6mA methylomes are  
370 preferentially associated with genes and transposable elements that form the gene-sparse  
371 compartments of *Phytophthora* genomes and have been implicated in adaptive evolution  
372 of these pathogens. We discovered that 6mA methyltransferases have expanded into three  
373 enzymes in *Phytophthora* which do not appear to be fully redundant given that each of the  
374 single knock-out mutants had a significantly reduced methylome. Based on mutant  
375 analyses, we noted that PsDAMT3 may have a preference for methylation of gene bodies  
376 after their TSS. Overall, the observed 6mA patterns around the TSS in the *PsDAMT3*  
377 mutant suggest complex patterns of 6mA methylation by the expanded 6mA  
378 methyltransferases of *P. sojae*.

379 Although 6mA appears to be prevalent in eukaryote genomes, most studies report low  
380 levels of abundance. Previous studies documented significant variation of 6mA abundance  
381 (6mA/A) ranging from 0.00019% to 2.8% among different eukaryotes<sup>12</sup>. Here, we  
382 determined the abundance of 6mA to be 0.05% and 0.04% in the mycelium stage of *P.*  
383 *infestans* and *P. sojae*, respectively. Beside modification abundance, genome distribution  
384 pattern is another way to value 6mA biological significance. Unlike reports from some other  
385 organisms, 6mA is not evenly distributed across *Phytophthora* genome from our research.  
386 We revealed an unexpected link between 6mA methylation and the two-speed genome  
387 architecture of *Phytophthora* genomes. We noted an enrichment of 6mA peaks in the  
388 intergenic regions, particularly in repeat sequences such as DNA and LTR transposable  
389 elements. Other recent studies have suggested that 6mA participates in the regulation of  
390 transposon expression in *Drosophila* and mammals<sup>14,16</sup>. It has been recognized that  
391 proliferation of transposable elements could drive the adaptive genome evolution of  
392 filamentous pathogens, such as plant pathogenic fungi and oomycetes. To control the  
393 activity and the spread of these repetitive sequences, transposable-element rich regions  
394 are normally condensed with a high level of DNA methylation<sup>38,39</sup>. The genomes of  
395 *Phytophthora* species have a greater proportion of repetitive sequences compared to other  
396 oomycete species that have been sequenced to date<sup>25</sup>. We speculate that DAMT gene  
397 expansion in *Phytophthora* species was likely a consequence of transposable-element  
398 activity and that the occurrence of 6mA in repeat elements might function to inhibit the  
399 activity and spread of transposable elements in *Phytophthora* species. Therefore, 6mA  
400 may play a role in regulating genome integrity and plasticity to the optimal levels necessary  
401 for rapid evolution.

402 Recent studies documented that 6mA is associated with active genes in several  
403 organisms, and a popular model is that 6mA may associate with DNA/nucleosome  
404 structure to alter gene transcriptional processes<sup>12, 15</sup>. In *Chlamydomonas*, 6mA shows a  
405 bimodal localization pattern around TSS and frequently modifies DNA linkers between  
406 adjacent nucleosomes around TSS<sup>15</sup>. Studies in *Xenopus laevis* and *Mus musculus* found  
407 a marked decrease in 6mA in the vicinity of TSS<sup>40</sup>. 6mA is also predominantly distributed

408 around TSS in a few fungal species<sup>12</sup>. In *P. infestans* and *P. sojae*, we observed a bimodal  
409 distribution pattern of 6mA enriched regions flanking the TSS, but with a clear depletion at  
410 the TSS itself and immediately downstream. This pattern resembles 6mA methylation  
411 described for the green algae *Chlamydomonas*<sup>41</sup>. Our comparisons of transcriptome and  
412 methylome data suggest that 6mA is negatively correlated with gene expression in the two  
413 *Phytophthora* species. Indeed, 6mA depletion is primarily located upstream of TSS in  
414 *Chlamydomonas* whereas it mainly located downstream of TSS in the two *Phytophthora*  
415 species. This could account for the apparent different associations of 6mA with gene  
416 expression in oomycetes and green algae. Our results are more reminiscent of a recent  
417 report in mammalian systems that 6mA is a negative gene expression mark in mouse  
418 embryonic stem cells<sup>16</sup>. This is consistent with our hypothesis that 6mA inhibits transposon  
419 activity. It is possible that interplays between 6mA marks and other epigenetic modifications,  
420 transcriptional regulators and other factors that are enriched around TSS, work in concert  
421 to regulate gene expression. Further investigations are required to explore the roles of 6mA  
422 in the modulation of gene expression.

423 *Phytophthora* genomes are well known for their bipartite “two-speed” architecture with  
424 hundreds of gene sparse regions comprised of repeat sequences and virulence effector  
425 genes serving as a cradle for adaptive evolution<sup>27-29</sup>. *Phytophthora* genes in the GSR tend  
426 to have higher 6mA levels and are also enriched in plant-induced genes that are normally  
427 silenced *in vitro*<sup>27,42</sup>. Indeed, we observed higher 6mA levels in secretome genes and RxLR  
428 effector genes (**Supplementary Fig. 8b, c**). This data is also consistent with the  
429 observation that 6mA marks are associated with low gene expression levels and may  
430 therefore contribute to the global down-regulation of virulence effector genes during  
431 vegetative stages, as proposed for the fungal pathogen *Leptosphaeria maculans*<sup>43</sup>.  
432 Alternatively, 6mA marks may contribute to the stochastic gene silencing of effector genes,  
433 thus enabling the emergence of pathogen races that evade plant immunity. Indeed, effector  
434 gene silencing has been linked to rapid evolution in both *P. sojae* and *P. infestans*<sup>44,45</sup>. In  
435 addition, *Phytophthora* species tend to exhibit high levels of expression polymorphisms in  
436 genes located in the GSRs<sup>46</sup>. In summary, we hypothesize that 6mA is involved in virulence  
437 gene expression, thus shaping host adaptation and enhancing evolvability in the plant  
438 pathogen *Phytophthora*.

439 In this study, we identified genes predicted to encode 6mA methyltransferases and  
440 demethylases in *P. infestans* and *P. sojae*. We initially focused on studying the functionality  
441 of the predicted 6mA methyltransferases to provide evidence that *Phytophthora* species  
442 have the inherent capability to perform this DNA modification. Our present work shows that  
443 DAMT homologs are the major N6-adenine methyltransferases in *Phytophthora* species.  
444 Although MT-A70 homologous proteins function in performing 6mA methylation in *C.*  
445 *elegans*<sup>13</sup>, our findings suggest that MT-A70 type methylases do not participate in 6mA  
446 methylation in *P. infestans* or *P. sojae*. MT-A70 homologs are either missing or  
447 pseudogenized in the *Phytophthora* species we examined. Our results also indicate that  
448 DAMTs underwent gene expansion in *Phytophthora* species compared to related oomycete  
449 genera such as *Hyaloperonospora* and *Albugo*. Among the three putative  
450 methyltransferases we characterized, DAMT3 appears to be the ancestral gene and



451 encodes the methylase with the highest *in vitro* activity. To our surprise, knockout of each  
452 of the *DAMT* genes in *P. sojae* resulted in a substantial and comparable reduction of 6mA  
453 abundance *in vivo*. Like the *psdamt3* mutant, 6mA abundance in the *psdamt1* and *psdamt2*  
454 mutants is reduced to a similar level, despite the differences we observed in the *in vitro*  
455 activity of each of the DAMT enzymes. The results suggest that all three DAMT genes are  
456 required for efficient 6mA methylation in *P. sojae*.

457 The observation that all three *Phytophthora* DAMT genes contribute to 6mA genome  
458 methylation is intriguing. Our MeDIP-seq data uncovered that altered 6mA signals from the  
459 *psdamt3* mutant are unevenly spread across the genome. This observation suggests that  
460 certain 6mA sites could be preferentially regulated by *DAMT1* or *DAMT2*. Meanwhile, it  
461 also indicates that 6mA gene body modifications after the TSS are preferentially produced  
462 by *DAMT3*. We propose that gene expansion may have led *Phytophthora* 6mA  
463 methyltransferases to specialize, and thus they may not be fully functionally redundant.  
464 Previous reports showed that RNA adenine methylase METTL3/METTL14 form a stable  
465 heterodimer core complex in human cells<sup>21, 47</sup>. It remains possible that *Phytophthora*  
466 DAMTs associate as a complex and function collaboratively *in vivo*. The mode of action of  
467 *Phytophthora* DAMTs in the methylation process and their roles in targeting particular  
468 genome compartments require further investigation.

469 The mechanisms underpinning epigenetic modifications in *Phytophthora* have  
470 remained poorly understood ever since the observations of internuclear spread of gene  
471 silencing by van West and colleagues almost 20 years ago<sup>48</sup>. DNA methylation inhibitor 5-  
472 azacytidine and histone deacetylase inhibitor trichostatin-A released the silencing state of  
473 the *inf1* elicitor gene in *P. infestans*<sup>48</sup>. Silencing Dicer-like, Argonaute, and histone  
474 deacetylase genes reversed the expression of sporulation gene *cdc14*<sup>49</sup>. More recently,  
475 naturally occurring gene silencing of an avirulence effector gene in *P. sojae* was associated  
476 with the appearance of small RNAs<sup>44</sup>. These data suggest that epigenetic regulation plays  
477 a role in virulence and development of *Phytophthora* species. Although DNA methylation  
478 is a common type of epigenetic modification in many organisms, the extent to which  
479 *Phytophthora* genomes are methylated has remained unclear. Van West and his  
480 colleagues failed to detect 5mC by bisulfite sequencing in an endogenous locus that is  
481 sensitive to DNA methylation inhibitor<sup>48</sup>. Our results not only clarify that 5mC is absent  
482 in *Phytophthora* species but also provide evidence that 6mA shapes the epigenetic  
483 landscape in this lineage of organisms. To our best knowledge this is also the first 6mA  
484 methylome report from stramenopile or heterokonts organisms. This work provides a  
485 starting point to further explore 6mA epigenetic regulation in oomycete organisms, with  
486 important implications for plant pathology and management of plant diseases. Our results  
487 together with emerging studies in other organisms suggest that 6mA fulfills distinct and  
488 perhaps differing roles across the spectrum of eukaryotic organisms.

489

490

## 491 **Methods**

### 492 **Phytophthora and plant cultivation**

493 *P. sojae* reference strain P6497 was routinely cultured on solid 10% V8 agar medium  
494 at 25 ° C in the dark. Non-sporulating hyphae were cultured at 25 ° C in the dark using 10%  
495 V8 liquid medium for 3 days. *P. infestans* T30-4 strain was routinely cultured on the solid  
496 RSA/V8 medium at 18 ° C in the dark. Non-sporulating hyphae were cultured at 18 ° C in  
497 the dark in 10% V8 medium for 6-7 days. Hyphae were collected and immediately frozen  
498 using liquid nitrogen. Soybean cultivar Hefeng47 and Williams were used to provide  
499 etiolated hypocotyl after growing at 25 ° C (16h) and 22 ° C (8h) for 4 days in the dark.

### 500 **Data sampling**

501 For homologous protein search, we selected 23 sequenced species, including 15  
502 oomycete species and 8 model organisms as shown in Fig.1a. Their genome sequences  
503 were downloaded from EnsemblGenomes (<http://ensemblgenomes.org/>) and Joint  
504 Genome Institute (<http://genome.jgi.doe.gov/>). N6-adenineMlase (PF10237), MT-A70  
505 (PF05063), DAM (PF05869), DNA\_Methylase (PF00145), and MethyltransfD12 (PF02086)  
506 from the PFAM database were used to BLAST search homologous enzymes with an E-  
507 value cut-off  $10^{-5}$  <sup>29,30</sup>.

### 508 **Dot blot assay**

509 Genomic DNA of *P. sojae* and *P. infestans* were extracted using TIANGEN DNasecure  
510 Plant kit. Different amounts of gDNA were denatured at 95 ° C for 5 mins and chilled in ice  
511 for 10 mins. DNA were spotted on HybondTM-N+ membranes. The membrane was allowed  
512 to dry at 37 ° C for 20 mins and then crosslinked using HL-2000 HybriLinker for 5 mins.  
513 The membrane was blocked in 5% milk PBST for 1h at room temperature, and then  
514 incubated with 6mA antibody (sysis202003) in 5% milk PBST overnight at 4 ° C. After 3x  
515 10 min washes with PBST, DNA and membrane were incubated with secondary antibody  
516 (ab6721) for 30 mins at room temperature. After 3x 10 min washes with PBST, the  
517 membrane was treated with Pierce ECL Western Blotting Substrate (Prod#32106) and  
518 detected by Tanon-5200Mutil. 100 ng input DNA of every samples were loaded on 1%  
519 agarose gels, followed by air drying for 5 mins and photographed using ClinX GenoSens.

### 520 **HPLC analysis for 5mC**

521 The HPLC separation was performed on a Zorbax SB-C18 column (2.1 mm x 150 mm,  
522 5 mm, Agilent) with a flow rate of 0.8 mL/min at 30 ° C. Methanol (with 0.1% Formic Acid,  
523 v/v, solvent A) and 10 mM potassium phosphate monobasic in water (with 0.1% Formic  
524 Acid, v/v, solvent B) were employed as mobile phase. A gradient of 3 min 90% B with a  
525 flow rate of 0.8 mL/min, 1 min 90% B with a flow rate of 0.8-0.2 mL/min, 11 min 90% B with  
526 a flow rate of 0.2 mL/min, 3 min 90% B with a flow rate of 0.2-1.2 mL/min, 10 min 90% B  
527 with a flow rate of 1.2 mL/min, and 2 min 90% B with a flow rate of 1.2-0.2 mL/min was  
528 used.

## 529 **UPLC-ESI-MS/MS analysis for 5mC and 6mA**

530 Analysis of the DNA samples was performed on UPLC-ESI-MS/MS system consisting  
531 of a Waters Xevo TQ-S micro mass spectrometer (Waters, Milford, MA, USA) with an  
532 electrospray ionization source (ESI) and an Acquity UPLC-I-Class™ System (Waters,  
533 Milford, MA, USA). Data acquisition and processing were performed using Masslynx  
534 software (version 4.1, Waters, Manchester, UK). The UPLC separation was performed on  
535 a reversed-phase column (BEH C18, 2.1 mm×50 mm, 1.7 μm; Waters) with a flow rate of  
536 0.2 mL/min at 35 ° C. FA in water (0.1%, v/v, solvent A) and FA in methanol (0.1%, v/v,  
537 solvent B) were employed as mobile phase. A gradient of 5 min 5% B, 10 min 5-30% B, 5  
538 min 30-50% B, 3 min 50-5% B, and 17 min 5% B was used. The mass spectrometry  
539 detection was performed under positive electrospray ionization mode.

540 A HPLC-ESI-MS/MS system, consisting of an electrospray-time-of-flight mass  
541 spectrometry (Triple TOF 5600+, AB Sciex) and a liquid chromatography (LC-20ADXR  
542 HPLC, Shimadzu), was also used for 5mC detection. Data acquisition and processing were  
543 performed using PeakView version 2.0 (AB Sciex). The HPLC separation was performed  
544 on a reversed-phase column (C18, 2.1 mm×100 mm, 2.6 μm; Kinetex) with a flow rate of  
545 0.2 mL/min at 40 ° C. FA in water (0.1%, v/v, solvent A) and FA in methanol (0.1%, v/v,  
546 solvent B) were employed as mobile phase. A gradient of 15 min 20-90% B, 3 min 90% B,  
547 0.1 min 90-20% B, and 1.9 min 20% B was used. The mass spectrometry detection was  
548 performed under ESI positive mode with a DuoSpray dual-ion source.

## 549 **DpnI-dependent methylation assay**

550 DpnI-dependent methylation assay was performed as previously described<sup>34</sup>. The  
551 reaction contained 20 mM Tris-HCl, pH 8.0, 50 mM NaCl, 7 mM 2-mercaptoethanol, 1 mM  
552 EDTA, 0.1 mg/ml bovine serum albumin (BSA), 1 μg N6 -methyladenine-free lambda DNA,  
553 purified recombinant proteins (1-27 μg), and 50 μM unlabeled AdoMet. The reaction  
554 system were incubated at 37 ° C for 1 hour, and then 65 ° C for 15 min to stop the reaction.  
555 The methylated DNA was digested by 5U DpnI at 37 ° C for 1 hour. Digestion was stopped  
556 by heat inactivation by incubating at 80 ° C for 20 mins. 1% agarose gel electrophoresis  
557 was used to check digestion. PsDAMT1, PsDAMT2, PsDAMT3, DAM, PsAvr3c were  
558 cloned into pET32a-c (+). The recombinant plasmids were transformed into *E. coli* HST04  
559 strain (*dam*<sup>-</sup>, *dcm*<sup>-</sup>). Bacteria were grown overnight at 37 ° C. *E. coli* gDNA were extracted  
560 using TIANamp Bacteria DNA Kit. DpnI was bought from NEB and used as protocol  
561 described. All the samples and standards were loaded at 1 μg. 1% agarose gel  
562 electrophoresis was used to check digestion results.

## 563 **MeDIP-seq (6mA-IP-seq)**

564 MeDIP-seq used in this paper was optimized from several protocols<sup>13-15</sup>. gDNA was  
565 extracted using TIANGEN DNaseure Plant Kit and then treated with RNase A overnight.  
566 Then the gDNA was diluted to 100 ng/μl with TE buffer, 100μl diluted gDNA was put in each  
567 tube and sonicated to 200-400 bp using Biorupter UCD-600. The 200-400 bp sized DNA  
568 was extracted using Takara Gel DNA Extraction Kit ver.4.0. DNA was denatured at 95 ° C  
569 for 10 mins and chilled in ice immediately for 5 mins. 20 μl of denatured DNA was stored

570 as input. The rest of the DNA was incubated with 3  $\mu$ g 6mA antibody at 4  $^{\circ}$  C for more than  
571 6 hours. Dyna beads (ThermoFisher 10001D) were washed twice using 1 $\times$ IP buffer and  
572 pre-blocked in 0.8 mL 1 $\times$ IP buffer with 20  $\mu$ g/ $\mu$ l BSA. Pre-blocked beads were washed  
573 twice using 1 $\times$ IP buffer (5 $\times$ IP buffer: 50mM Tris-HCl, 750mM NaCl and 0.5% vol/vol  
574 IGEPAL CA-630), and then incubated DNA-antibody was added to pre-blocked beads, and  
575 rotated overnight at 4  $^{\circ}$  C. The beads were washed 4 times for 10 mins with 1 $\times$ IP buffer.  
576 IP products were suspended in 400  $\mu$ L preheated elution buffer at 65  $^{\circ}$  C for 15 mins to  
577 yield the 6mA-IPed library; repeat this step using 300  $\mu$ L preheated elution buffer (Elution  
578 buffer: 50 mM NaCl, 20 mM Tris-HCl, 5 mM EDTA, 1% SDS). Eluted DNA was combined  
579 and then added to an equal volume of phenol-chloroform-isopentanol, vortexed and  
580 centrifuged at 13000 rpm for 5 mins at room temperature. The aqueous phase was  
581 transferred into a new tube and mixed with an equal volume of ethanol to precipitate the  
582 eluted DNA. The library was prepared using VAHTS<sup>TM</sup> Turbo DNA Library Prep Kit for  
583 Illumina and AHTS<sup>TM</sup> Multiplex Oligos set 1 for Illumina. Sequencing was done by BGI  
584 (Shenzhen) and GENEWIZ (Suzhou).

### 585 ***Phytophthora* transformation**

586 *Phytophthora* CRISPR/Cas9 gene editing and transformation was performed as  
587 previously described<sup>50</sup>. The sgRNA target sites were selected using an online tool  
588 (<http://grna.ctegd.uga.edu/>).

### 589 **RNA extraction, RNA-seq and qRT-PCR**

590 Total RNA of 3-day-old *P. sojae* hyphae were isolated using Omega Total RNA Kit I  
591 according to the manufacturer's manual. RNA quality was measured using Nanodrop ND-  
592 1000 and 1% agarose gel electrophoresis. RNA-seq service was provided by BGI and  
593 1gene. RNA reverse transcription was conducted using Takara PrimerScript<sup>TM</sup> RT reagent  
594 Kit with gDNA eraser. Quantitative RT-PCR was performed using the ABI PRISM 7500 Fast  
595 Real-Time PCR System.

### 596 **High-throughput sequence data analysis**

597 RNA-seq data was mapped to *P. sojae* v1.1 using Tophat2, and MeDIP-seq data was  
598 mapped to *P. sojae* v1.1 using bowtie2. Gene expression data was generated by Cufflinks.  
599 MeDIP-seq data was normalized and visualized using deepTools<sup>51</sup> and IGV<sup>52</sup>. 6mA  
600 methylation peaks were called using SICER. Figure of two-speed genome was produced  
601 as describe before<sup>53</sup>, 6mA distribution was calculated as  $\log_2(\text{IP}_{\text{RPKM}}/\text{input}_{\text{RPKM}}+1)$ , RPKM  
602 value from the regions before TSS 500bp (real length and reads number will be calculated  
603 if the length of flanking intergenic regions < 500bp). *Phytophthora* repeat sequences were  
604 referenced in previous publications<sup>24</sup> and re-annotated here by RepeatMasker<sup>54</sup>.

605

## 606 References

- 607 1. Bird, A. Perceptions of epigenetics. *Nature* **447**, 396-8 (2007).
- 608 2. Ratel, D., Ravanat, J.L., Berger, F. & Wion, D. N6-methyladenine: the other methylated base of  
609 DNA. *Bioessays* **28**, 309–315 (2006).
- 610 3. Vasu, K. & Nagaraja, V. Diverse Functions of Restriction-Modification Systems in Addition to  
611 Cellular Defense. *Microbiology & Molecular Biology Reviews Mmbr* **77**, 53 (2013).
- 612 4. Feng, S., Jacobsen, S.E. & Reik, W. Epigenetic reprogramming in plant and animal development.  
613 *Science* **330**, 622 (2010).
- 614 5. Jones, P.A. Functions of DNA methylation: islands, start sites, gene bodies and beyond. *Nature*  
615 *Reviews Genetics* **13**, 484-92 (2012).
- 616 6. Zhong, X. Comparative epigenomics: a powerful tool to understand the evolution of DNA  
617 methylation. *New Phytologist* **210**, 76 (2016).
- 618 7. Arber, W. & Dussoix, D. Arber, W. & Dussoix, D. Host specificity of DNA produced by Escherichia  
619 coli. I. Host controlled modification of bacteriophage . J. Mol. Biol. 5, 18-36. *Journal of*  
620 *Molecular Biology* **5**, 18-36 (1962).
- 621 8. Kahng, L. & Shapiro, L. The CcrM DNA methyltransferase of *Agrobacterium tumefaciens* is  
622 essential, and its activity is cell cycle regulated. *Journal of Bacteriology* **183**, 3065 (2001).
- 623 9. Julio, S.M. *et al.* DNA Adenine Methylase Is Essential for Viability and Plays a Role in the  
624 Pathogenesis of *Yersinia pseudotuberculosis* and *Vibrio cholerae*. *Infection & Immunity* **69**,  
625 7610-7615 (2001).
- 626 10. Reisenauer, A. & Shapiro, L. DNA methylation affects the cell cycle transcription of the CtrA  
627 global regulator in *Caulobacter*. *Embo Journal* **21**, 4969-77 (2002).
- 628 11. Wright, R., Stephens, C. & Shapiro, L. The CcrM DNA methyltransferase is widespread in the  
629 alpha subdivision of proteobacteria, and its essential functions are conserved in *Rhizobium*  
630 *meliloti* and *Caulobacter crescentus*. *Journal of Bacteriology* **179**, 5869-77 (1997).
- 631 12. Mondo, S.J. *et al.* Widespread adenine N6-methylation of active genes in fungi. *Nat Genet*  
632 (2017).
- 633 13. Greer, E.L. *et al.* DNA Methylation on N6-Adenine in *C. elegans*. *Cell* **161**, 868-78 (2015).
- 634 14. Zhang, G. *et al.* N6-methyladenine DNA modification in *Drosophila*. *Cell* **161**, 893 (2015).
- 635 15. Fu, Y. *et al.* N6-methyldeoxyadenosine marks active transcription start sites in *Chlamydomonas*.  
636 *Cell* **161**, 879-92 (2015).
- 637 16. Wu, T.P. *et al.* DNA methylation on N6-adenine in mammalian embryonic stem cells. *Nature*  
638 **532**, 329 (2016).
- 639 17. Luo, G.Z. *et al.* Characterization of eukaryotic DNA N(6)-methyladenine by a highly sensitive  
640 restriction enzyme-assisted sequencing. *Nat Commun* **7**, 11301 (2016).
- 641 18. Liu, J. *et al.* Abundant DNA 6mA methylation during early embryogenesis of zebrafish and pig.  
642 *Nat Commun* **7**, 13052 (2016).
- 643 19. Iyer, L.M., Zhang, D. & Aravind, L. Adenine methylation in eukaryotes: Apprehending the  
644 complex evolutionary history and functional potential of an epigenetic modification. *Bioessays*  
645 **38**, 27-40 (2016).
- 646 20. Iyer, L.M., Abhiman, S. & Aravind, L. Chapter 2 – Natural History of Eukaryotic DNA Methylation  
647 Systems. *Progress in Molecular Biology & Translational Science* **101**, 25 (2011).
- 648 21. Liu, J. *et al.* A METTL3-METTL14 complex mediates mammalian nuclear RNA N6-adenosine  
649 methylation. *Nat Chem Biol* **10**, 93-5 (2014).

- 650 22. Liu, F. *et al.* ALKBH1-Mediated tRNA Demethylation Regulates Translation. *Cell* **167**, 816 (2016).
- 651 23. Zheng, G. *et al.* ALKBH5 Is a Mammalian RNA Demethylase that Impacts RNA Metabolism and  
652 Mouse Fertility. *Rna Biology* **49**, 18 (2013).
- 653 24. Phillips, A.J., Anderson, V.L., Robertson, E.J., Secombes, C.J. & van West, P. New insights into  
654 animal pathogenic oomycetes. *Trends Microbiol* **16**, 13-9 (2008).
- 655 25. Haas, B.J. *et al.* Genome sequence and analysis of the Irish potato famine pathogen  
656 *Phytophthora infestans*. *Nature* **461**, 393-8 (2009).
- 657 26. Tyler, B.M. *et al.* *Phytophthora* genome sequences uncover evolutionary origins and  
658 mechanisms of pathogenesis. *Science* **313**, 1261-6 (2006).
- 659 27. Raffaele, S. *et al.* Genome evolution following host jumps in the Irish potato famine pathogen  
660 lineage. *Science* **330**, 1540 (2010).
- 661 28. Raffaele, S. & Kamoun, S. Genome evolution in filamentous plant pathogens: why bigger can  
662 be better. *Nat Rev Microbiol* **10**, 417-30 (2012).
- 663 29. Dong, S., Raffaele, S. & Kamoun, S. The two-speed genomes of filamentous pathogens: waltz  
664 with plants. *Current Opinion in Genetics & Development* **35**, 57-65 (2015).
- 665 30. Finn, R.D. *et al.* The Pfam protein families database. *Nucleic Acids Research* **36**, D281 (2010).
- 666 31. Eddy, S.R. HMMER: profile HMMs for protein sequence analysis. (1998).
- 667 32. Kossykh, V.G., Schlagman, S.L. & Hattman, S. Conserved sequence motif DPPY in region IV of  
668 the phage T4 Dam DNA-[N6-adenine]-methyltransferase is important for S-adenosyl-L-  
669 methionine binding. *Nucleic Acids Research* **21**, 4659-62 (1993).
- 670 33. Ye, W. *et al.* Digital gene expression profiling of the *Phytophthora sojae* transcriptome.  
671 *Molecular plant-microbe interactions : MPMI* **24**, 1530 (2011).
- 672 34. Ah-Fong, A.M., Kim, K.S. & Judelson, H.S. RNA-seq of life stages of the oomycete *Phytophthora*  
673 *infestans* reveals dynamic changes in metabolic, signal transduction, and pathogenesis genes  
674 and a major role for calcium signaling in development. *BMC Genomics* **18**, 198 (2017).
- 675 35. Erova, T.E. *et al.* DNA adenine methyltransferase influences the virulence of *Aeromonas*  
676 *hydrophila*. *Infect Immun* **74**, 410-24 (2006).
- 677 36. Luo, G.Z. & He, C. DNA N(6)-methyladenine in metazoans: functional epigenetic mark or  
678 bystander? *Nature Structural & Molecular Biology* **24**, 503 (2017).
- 679 37. Zang, C. *et al.* A clustering approach for identification of enriched domains from histone  
680 modification ChIP-Seq data. *Bioinformatics* **25**, 1952-1958 (2009).
- 681 38. Seidl, M.F., Cook, D.E. & Thomma, B.P. Chromatin Biology Impacts Adaptive Evolution of  
682 Filamentous Plant Pathogens. *PLoS Pathog* **12**, e1005920 (2016).
- 683 39. Seidl, M.F. & Bphj, T. Transposable Elements Direct The Coevolution between Plants and  
684 Microbes. (2017).
- 685 40. Koziol, M.J. *et al.* Identification of methylated deoxyadenosines in vertebrates reveals diversity  
686 in DNA modifications. *Nat Struct Mol Biol* **23**, 24-30 (2016).
- 687 41. Traller, J.C. *et al.* Genome and methylome of the oleaginous diatom *Cyclotella cryptica* reveal  
688 genetic flexibility toward a high lipid phenotype. *Biotechnology for Biofuels* **9**, 258 (2016).
- 689 42. Raffaele, S., Win, J., Cano, L.M. & Kamoun, S. Analyses of genome architecture and gene  
690 expression reveal novel candidate virulence factors in the secretome of *Phytophthora infestans*.  
691 *Bmc Genomics* **11**, 637 (2010).
- 692 43. Soyer, J.L. *et al.* Epigenetic control of effector gene expression in the plant pathogenic fungus  
693 *Leptosphaeria maculans*. *PLoS Genet* **10**, e1004227 (2014).

- 694 44. Qutob, D., Chapman, B.P. & Gijzen, M. Transgenerational gene silencing causes gain of virulence  
695 in a plant pathogen. *Nat Commun* **4**, 1349 (2013).
- 696 45. Pais, M. *et al.* Gene expression polymorphism underpins evasion of host immunity in an  
697 asexual lineage of the Irish potato famine pathogen. (2017).
- 698 46. Cooke, D.E. *et al.* Genome analyses of an aggressive and invasive lineage of the Irish potato  
699 famine pathogen. *PLoS Pathog* **8**, e1002940 (2012).
- 700 47. Wang, X. *et al.* Structural basis of N(6)-adenosine methylation by the METTL3-METTL14  
701 complex. *Nature* **534**, 575-8 (2016).
- 702 48. van West, P. *et al.* Internuclear gene silencing in *Phytophthora infestans* is established through  
703 chromatin remodelling. *Microbiology* **154**, 1482-90 (2008).
- 704 49. Vetukuri, R.R. *et al.* Evidence for involvement of Dicer-like, Argonaute and histone deacetylase  
705 proteins in gene silencing in *Phytophthora infestans*. *Mol Plant Pathol* **12**, 772-85 (2011).
- 706 50. Fang, Y. & Tyler, B.M. Efficient disruption and replacement of an effector gene in the oomycete  
707 *Phytophthora sojae* using CRISPR/Cas9. *Molecular Plant Pathology* **17**, 127 (2016).
- 708 51. Ramírez, F., DüNDAR, F., Diehl, S., Grüning, B.A. & Manke, T. deepTools: a flexible platform for  
709 exploring deep-sequencing data. *Nucleic Acids Research* **42**, 187-91 (2014).
- 710 52. Thorvaldsdóttir, H., Robinson, J.T. & Mesirov, J.P. Integrative Genomics Viewer (IGV): high-  
711 performance genomics data visualization and exploration. *Briefings in Bioinformatics* **14**, 178  
712 (2013).
- 713 53. Saunders, D.G., Win, J., Kamoun, S. & Raffaele, S. Two-dimensional data binning for the analysis  
714 of genome architecture in filamentous plant pathogens and other eukaryotes. *Methods Mol*  
715 *Biol* **1127**, 29-51 (2014).
- 716 54. Smit, R.H.P.G. <http://repeatmasker.org>.  
717  
718

719 **Acknowledgements**

720 We thank Dahua Chen's Lab (Chinese Academy of Sciences) for 6mA blind test and  
721 shared 6mA quantification protocol. Jianzhao Liu (Zhejiang University), Sebastian  
722 Schornack (University of Cambridge) and Brett Tyler (Ohio State University) are also  
723 appreciated for helpful discussions. Ms. Hairong Xie (Nanjing Agricultural University) for  
724 MeDIP-seq, Ms Jiangyan Xu (Nanjing Agricultural University) for 5mC detection. Mark  
725 Gijzen (Agriculture and Agri-Food Canada), and The Sainsbury Laboratory student  
726 Aleksandra Bialas, Erin Zess and Jess Upson contributed to the editing of the  
727 manuscript. This work was supported by the Chinese National Science Fund (31422044),  
728 Chinese Thousand Talents Plan to S. D., and the Fundamental Research Funds for the  
729 Central Universities (KYTZ201403).

730 **Author contributions**

731 H.C., L.Y.W., F.Z., X.L., S.O.O. and H.Y.M. performed experiments; H.D.S., H.C., F.M.,  
732 W.W.Y. analyzed data; H.C., T.T.G., L.B.J., Y.F.W., S.K., Y.C.W. and S.M.D designed the  
733 experiments and discussed. S.M.D., H.C. and S.K. wrote the manuscript.

734 **Competing financial interests**

735 No competing financial interest.

736 **Material & Correspondence**

737 Dr. Suomeng Dong will take care of material request and correspondence.

738 Address: Weigang NO.1, Xuanwu District, Nanjing, Jiangsu Province, China

739
